# Supplementary material for: DynTunKey: a dynamic distributed group key tunneling management protocol for heterogeneous wireless sensor networks
Source: Springer Nature journal article supplement (doi:10.1186/1687-1499-2014-9), 2014-01-17

Core Node

Sensor 1

..... Sensor i .....

Sensor n

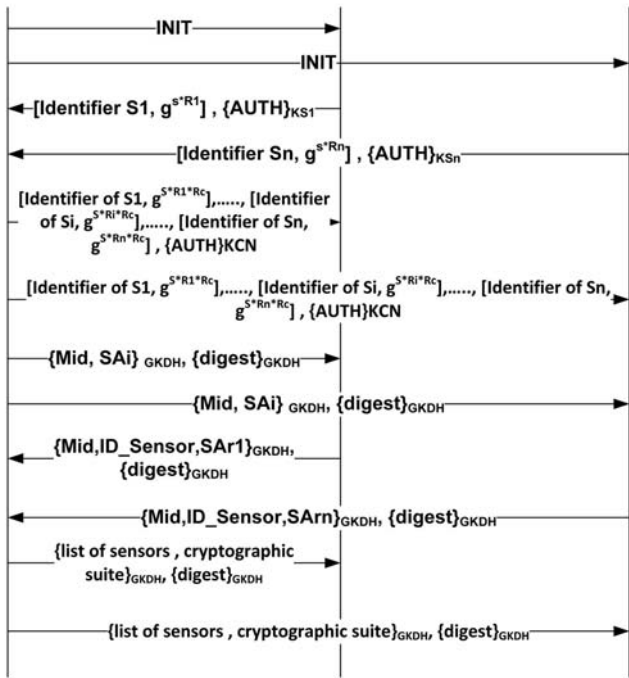

Supplement: 13638_2012_858_MOESM4_ESM.pdf [file 13638_2012_858_MOESM4_ESM.pdf]
