# Supplementary material for: DynTunKey: a dynamic distributed group key tunneling management protocol for heterogeneous wireless sensor networks
Source: Springer Nature journal article supplement (doi:10.1186/1687-1499-2014-9), 2014-01-17
Supplement: 13638_2012_858_MOESM5_ESM.pdf [file 13638_2012_858_MOESM5_ESM.pdf]

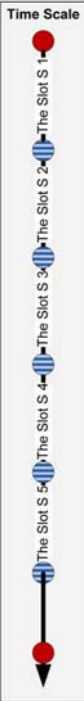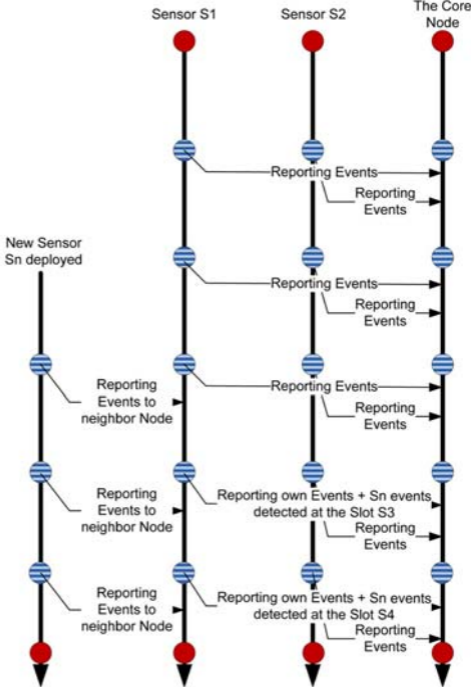

- The establishment of a new Group Key
- The reporting times
